# Supplementary material for: Cathepsin B p.Gly284Val Variant in Parkinson’s Disease Pathogenesis
Source: Int J Mol Sci. 2022 Jun 25;23(13):7086. doi: 10.3390/ijms23137086 (PMC9266886; doi:10.3390/ijms23137086)
Supplement: Supplementary file 1 [file ijms-23-07086-s001.zip]

Archive with 4 entries (4 files):
- Supplementary Material.pdf
- Supplementary Table S1.xlsx
- Supplementary Table S2.xlsx
- Supplementary Video S1.mp4
