# Supplementary material for: Cathepsin B p.Gly284Val Variant in Parkinson’s Disease Pathogenesis
Source: Int J Mol Sci. 2022 Jun 25;23(13):7086. doi: 10.3390/ijms23137086 (PMC9266886; doi:10.3390/ijms23137086)
Supplement: Supplementary file 1 [file ijms-23-07086-s001.zip › Supplementary Material.pdf]

**Supplementary Table S1.** All variants shared in both affected siblings with MAF <0.01 (NonFinnish European, gnomAD).

**Supplementary Table S2.** The CTSB variants (MAF <0.01, Non-Finnish European, gnomAD) reported in Mayo Clinic Florida familial Parkinson's disease cohort and Biobank control cohort.

**Supplementary Video S1.** The video of neurological examination of proband which revealed severe bradykinesia and rest tremor in Med-OFF, Stim-OFF and relief of the symptoms in Med-ON, Stim-ON. In affected brother right hand rest tremor and bradykinesia was noted in Med-OFF and improvement of the symptoms was observed with levodopa treatment.
